# Supplementary material for: Conformational sensitivity of surface selection rules for quantitative Raman identification of small molecules in biofluids
Source: Royal Society of Chemistry journal article supplement (doi:10.1039/c8nr04710c), 2018-01-01
Supplement: c8nr04710c1.pdf [file c8nr04710c1.pdf]

## Supporting Information

*for*

### **Conformational Sensitivity of Surface Selection Rules for Quantitative Raman Identification of Small Molecules in Biofluid**

Lei Li,<sup>a</sup> Chao Wang,<sup>d</sup> Lina Yang,<sup>a</sup> Mengke Su,<sup>a</sup> Fanfan Yu,<sup>a</sup> Li Tian,<sup>a</sup> and Honglin Liu<sup>\*a,b,c</sup>

<sup>a</sup> College of Food Science and Engineering, Hefei University of Technology, Hefei, Anhui 230009, China.

<sup>b</sup> Engineering Research Center of Bio-process, Ministry of Education, China.

<sup>c</sup> Molecular Science and Biomedicine Laboratory, State Key Laboratory of Chemo/Bio-Sensing and Chemometrics, College of Chemistry and Chemical Engineering, College of Life Sciences, and Aptamer Engineering Center of Hunan Province, Hunan University, Changsha, Hunan 410082, China

<sup>d</sup> Key Laboratory of Neutronics and Radiation Safety, Institute of Nuclear Energy Safety Technology, Chinese Academy of Sciences, Hefei, Anhui 230031, China.

\*Correspondence: [liuhonglin@mail.ustc.edu.cn](mailto:liuhonglin@mail.ustc.edu.cn)

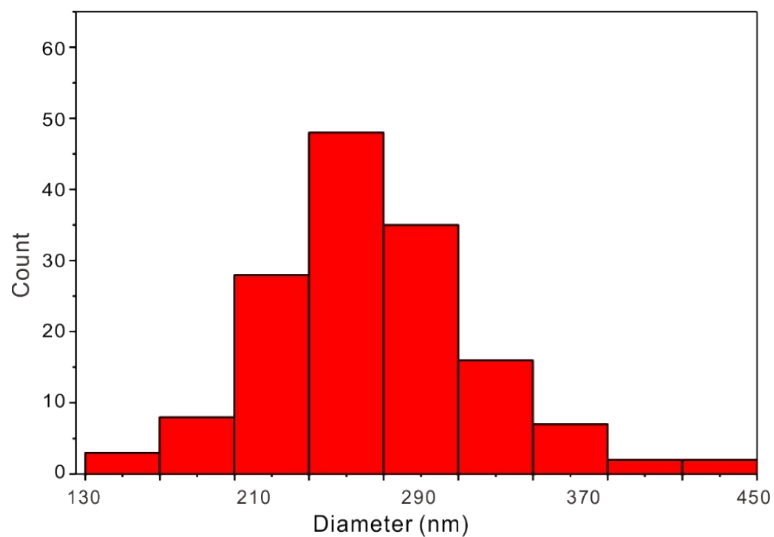

**Figure S1.** Diameter statistics of PS beads in Figure 1a.

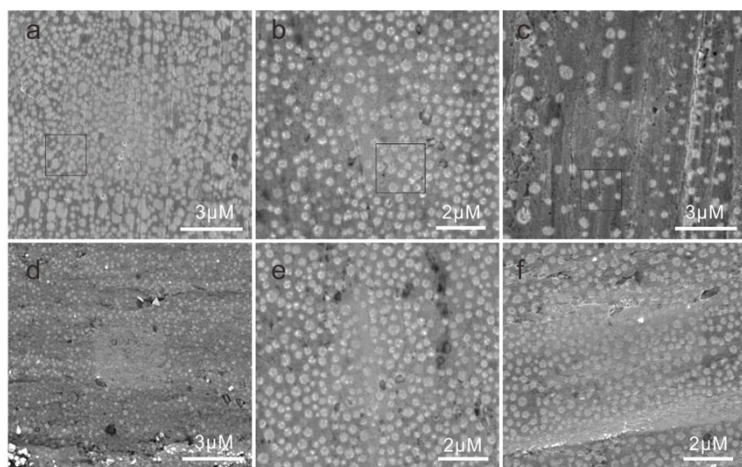

**Figure S2.** SEM images of polymer films formed under different experimental parameters. (a) PS/PMMA=1:9. (b) PS/PMMA=2:8. (c) PS/PMMA=3:7. Spin-coating speed at (d) 3500rpm, (e) 4000rpm and (f) 4500rpm.

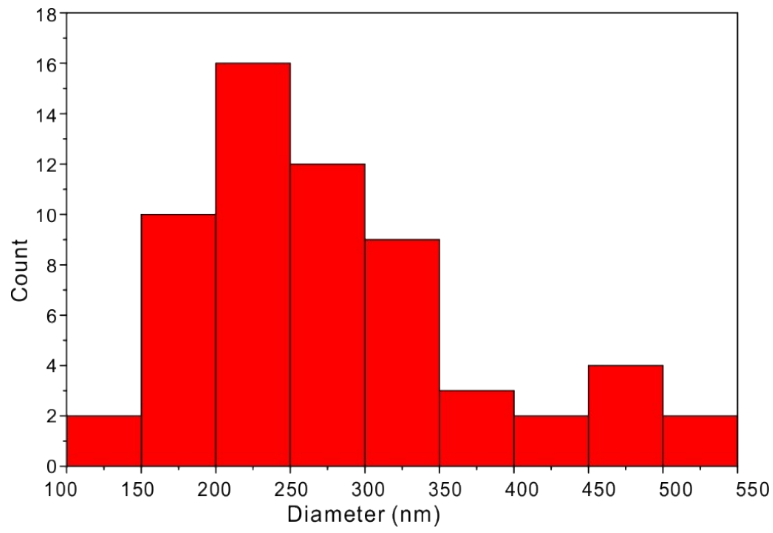

**Figure S3.** Diameter statistics of PS beads in Figure S2c.

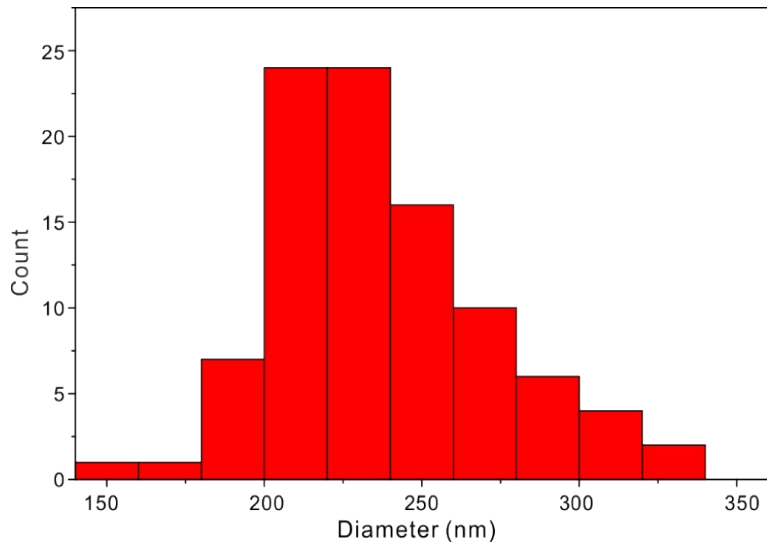

**Figure S4.** Diameter chart of the distribution holes in the PMMA film in Figure 1b.

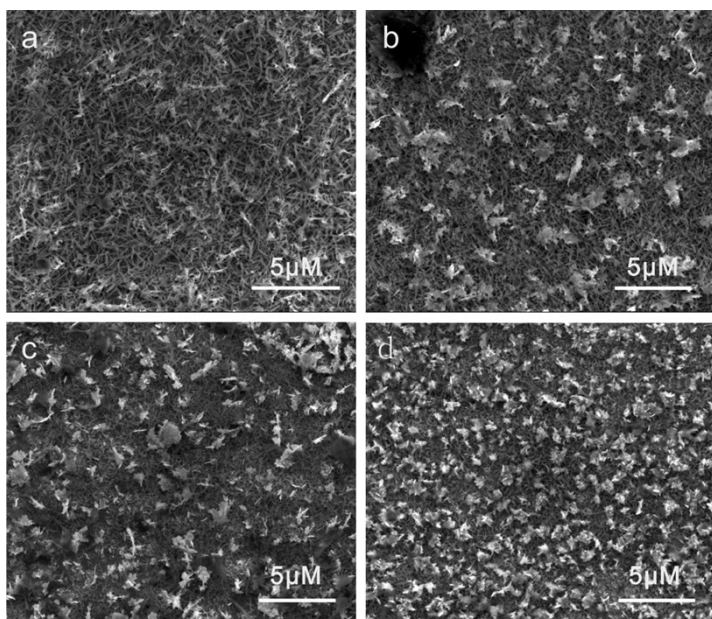

**Figure S5.** Ag structural growth conditions optimization with different soaking time in 3 mM AgNO<sub>3</sub> solution: (a) 5 s, (b) 10 s, (c) 15 s, (d) 2 mM AgNO<sub>3</sub> for 20s.

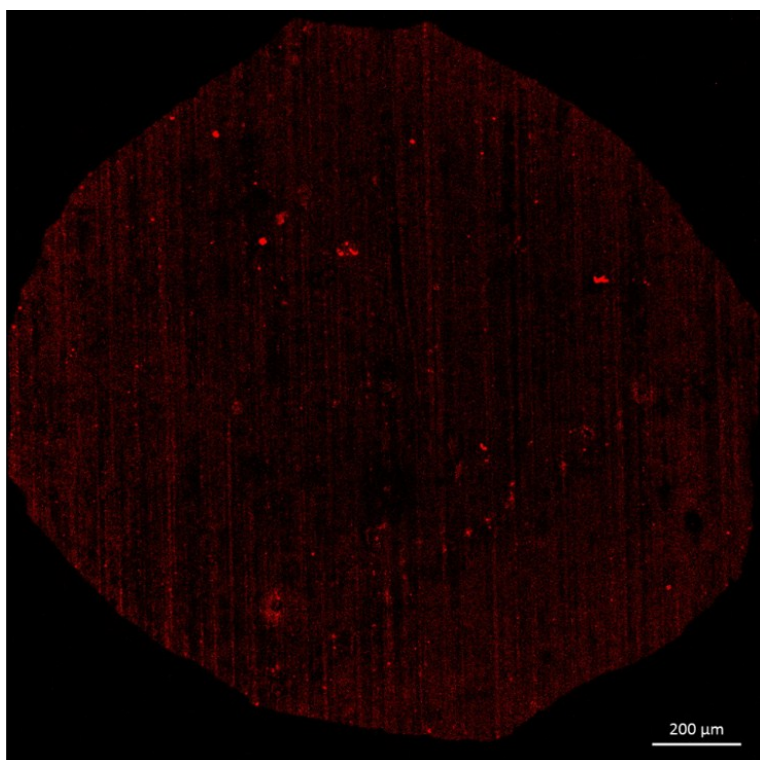

**Figure S6.** Confocal images of evaporation traces of R6G solution.

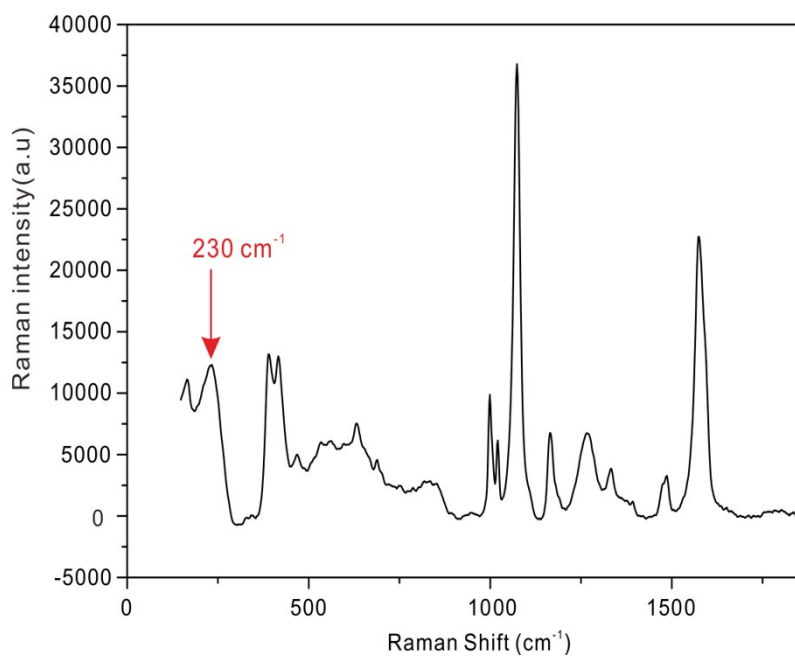

**Figure S7.** The Raman shift at 230 cm<sup>-1</sup> represents the Ag-S bond.

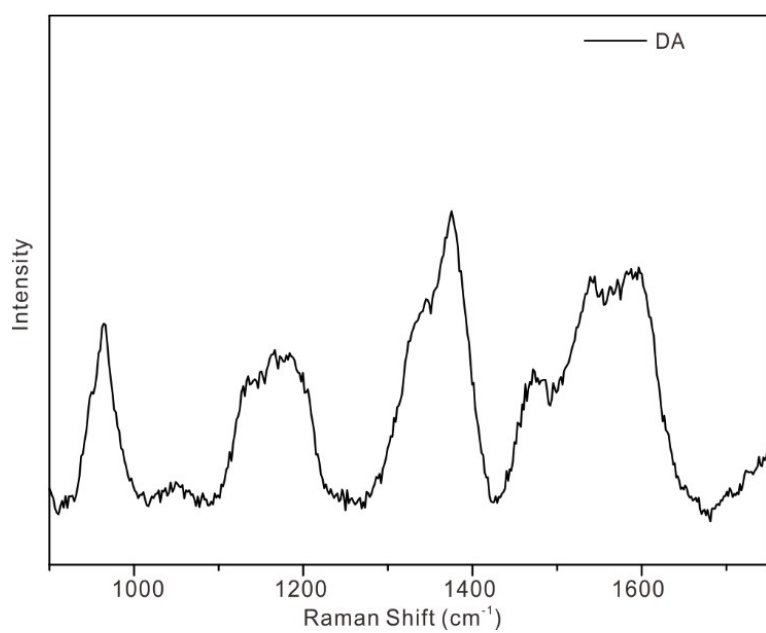

**Figure S8.** SERS signal of 10<sup>-4</sup> M DA solution on superhydrophobic substrate.

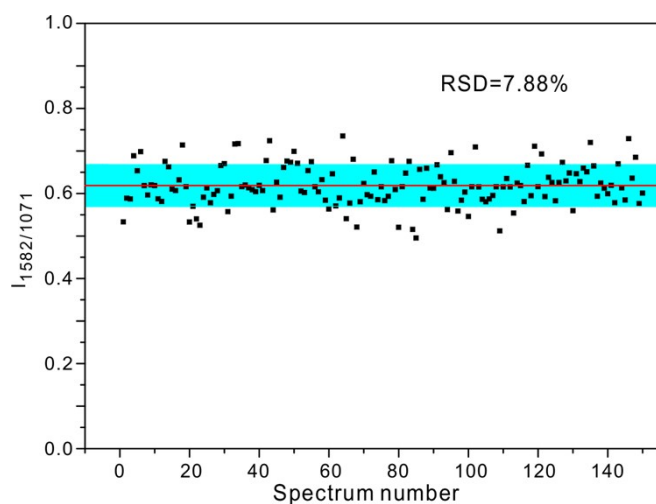

**Figure S9.** SERS reproducibility of MPBA on as-prepared platform via statistics analysis of a ratiometric indicator of relative peak intensity,  $I_{1582/1071}$ .

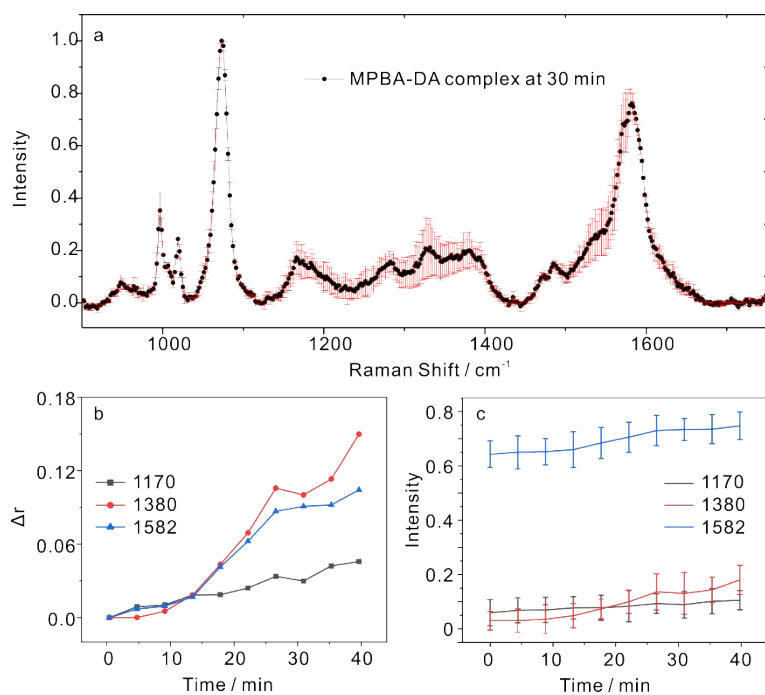

**Figure S10.** (a) Averaged SERS spectrum of MPBA-DA complexing at 30 min produced by triplicate measurements with standard deviations at each wavenumber. (b) Time-course variations ( $\Delta r$ ) of  $r_{1170/1071}$ ,  $r_{1380/1071}$ , and  $r_{1582/1071}$  in Figure 2d. (d) Time-dependent values of  $r_{1170/1071}$ ,  $r_{1380/1071}$ , and  $r_{1582/1071}$  in Figure 2d.

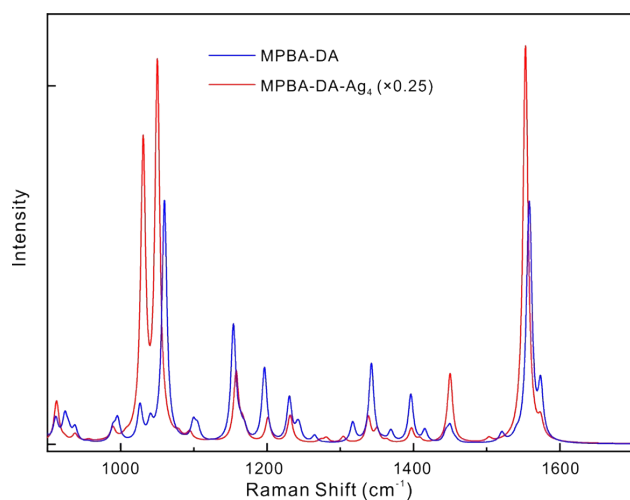

**Figure S11.** The Raman spectra of MPBA-DA and MPBA-DA bonded to an  $\text{Ag}_4$  cluster.

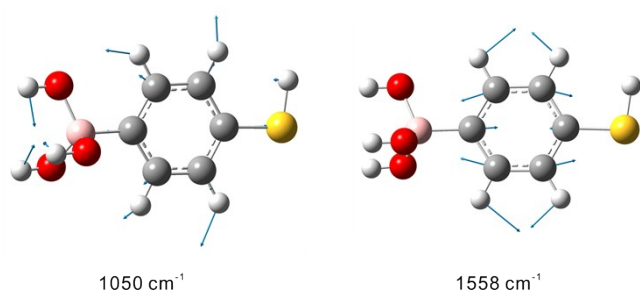

**Figure S12.** MPBA vibration mode at 1050  $\text{cm}^{-1}$  and 1558  $\text{cm}^{-1}$  in simulated Raman.

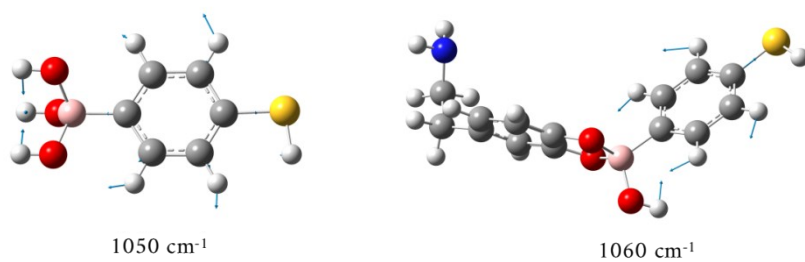

**Figure S13.** MPBA vibration mode at 1050  $\text{cm}^{-1}$  and 1060  $\text{cm}^{-1}$  in simulated Raman spectra of MPBA and MPBA-DA.

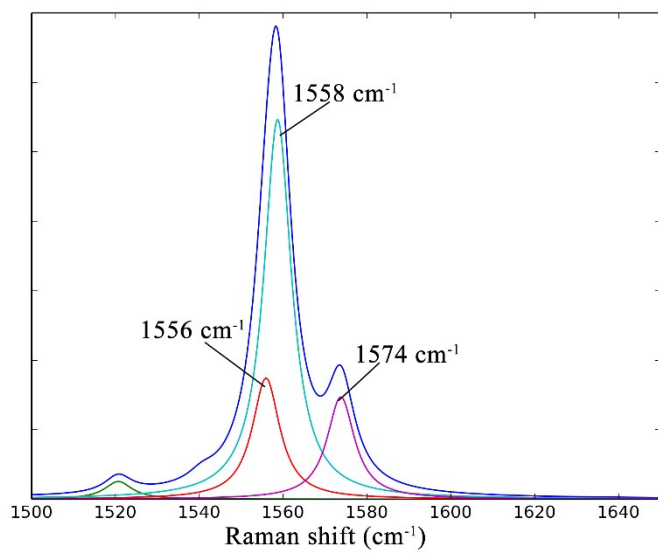

**Figure S14.** DFT calculated Raman spectrum of MPBA-DA and contributions of transition bands.
